# Supplementary material for: An Innovative Sandwich Type Biosensor towards Sensitive and Selective Monitoring of 2-Arachidonoylglycerol in Human Plasma Samples Using P(β-CD)-AuNPs-DDT as Amplificant Agent: A New Immuno-Platform for the Recognition of Endocannabinoids in Real Samples
Source: MDPI journal article supplement (doi:10.3390/bios12100791), 2022-09-26
Supplement: s1 [file s1]

## Supporting Information

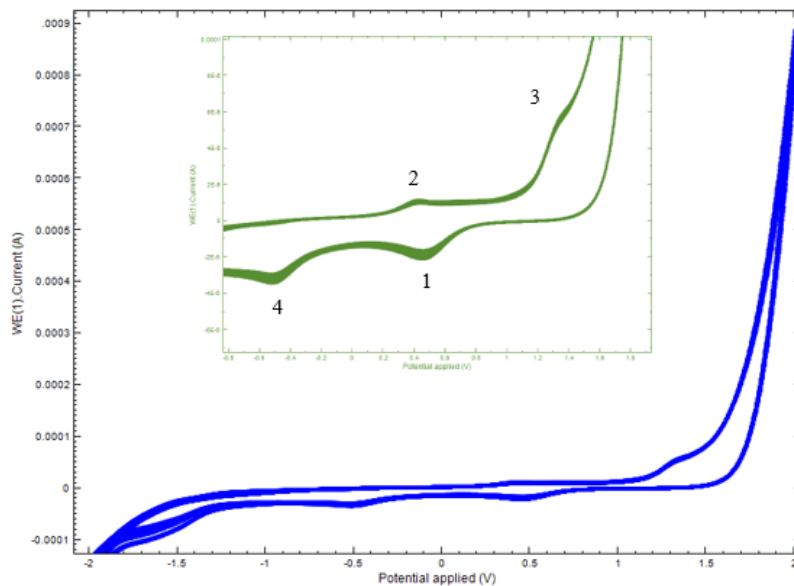

**Figure S1.** CV's of electropolymerization of  $\beta$ -CD on the surface of the GCE in the presence of 6 mM of  $\beta$ -CD dissolved in 0.05M PBS (pH=4) at  $0.07 \text{ V.s}^{-1}$  with 40 number of cycles.

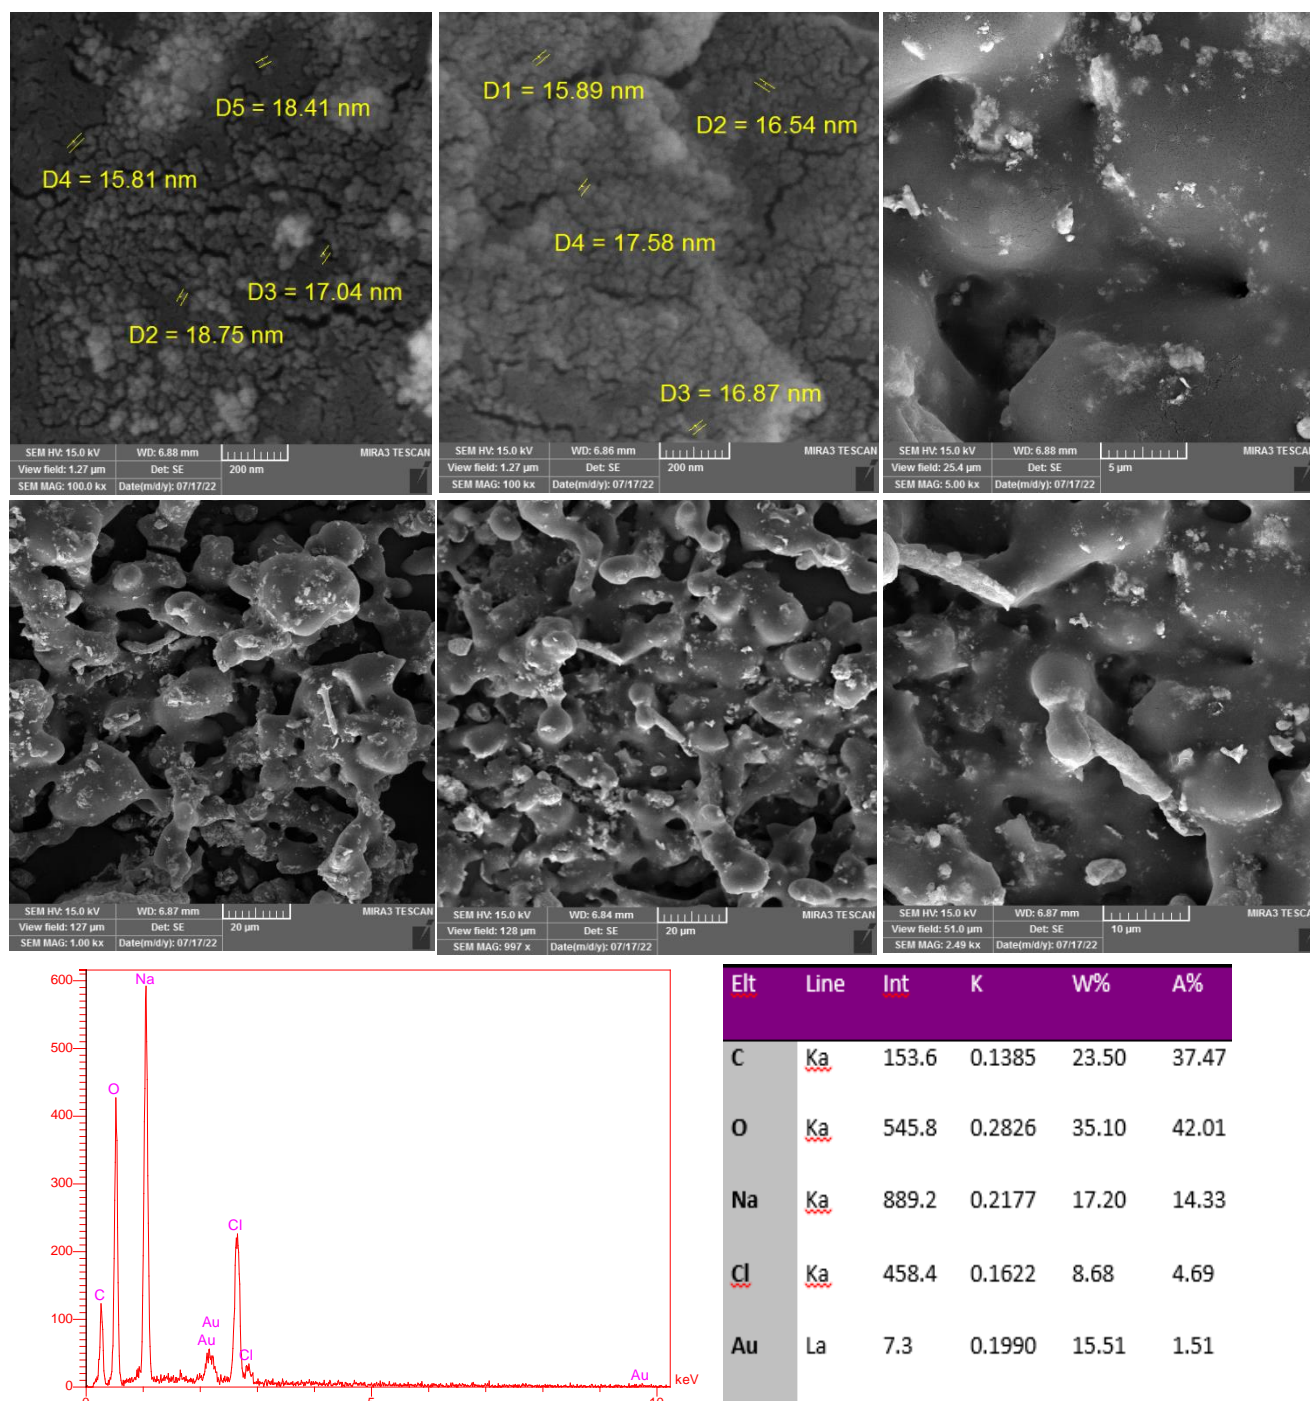

**Figure S2:** FE-SEM illustrations of AuNPs-DDT in different magnification along with EDS.

**A****Results**

|                                               | Size (d.n...         | % Number: | St Dev (d.n... |
|-----------------------------------------------|----------------------|-----------|----------------|
| <b>Z-Average (d.nm):</b> 79.23                | <b>Peak 1:</b> 29.06 | 100.0     | 7.937          |
| <b>Pdi:</b> 0.579                             | <b>Peak 2:</b> 0.000 | 0.0       | 0.000          |
| <b>Intercept:</b> 0.879                       | <b>Peak 3:</b> 0.000 | 0.0       | 0.000          |
| <b>Result quality</b> Refer to quality report |                      |           |                |

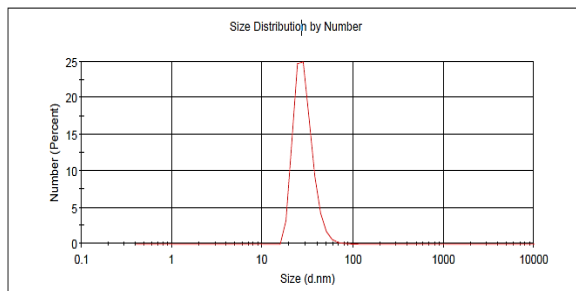**B****Results**

|                                                 | Mean (mV)            | Area (%) | St Dev (mV) |
|-------------------------------------------------|----------------------|----------|-------------|
| <b>Zeta Potential (mV):</b> -61.0               | <b>Peak 1:</b> -66.9 | 68.7     | 5.40        |
| <b>Zeta Deviation (mV):</b> 11.5                | <b>Peak 2:</b> -50.8 | 16.2     | 3.61        |
| <b>Conductivity (mS/cm):</b> 0.545              | <b>Peak 3:</b> -40.0 | 15.0     | 4.64        |
| <b>Result quality</b> See result quality report |                      |          |             |

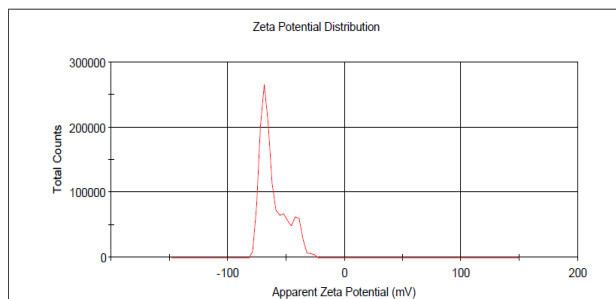

**Figure S3.A)** DLS diagram of AuNPs-DDT. **B)** Zeta-Potential of AuNPs-DDT.

A)

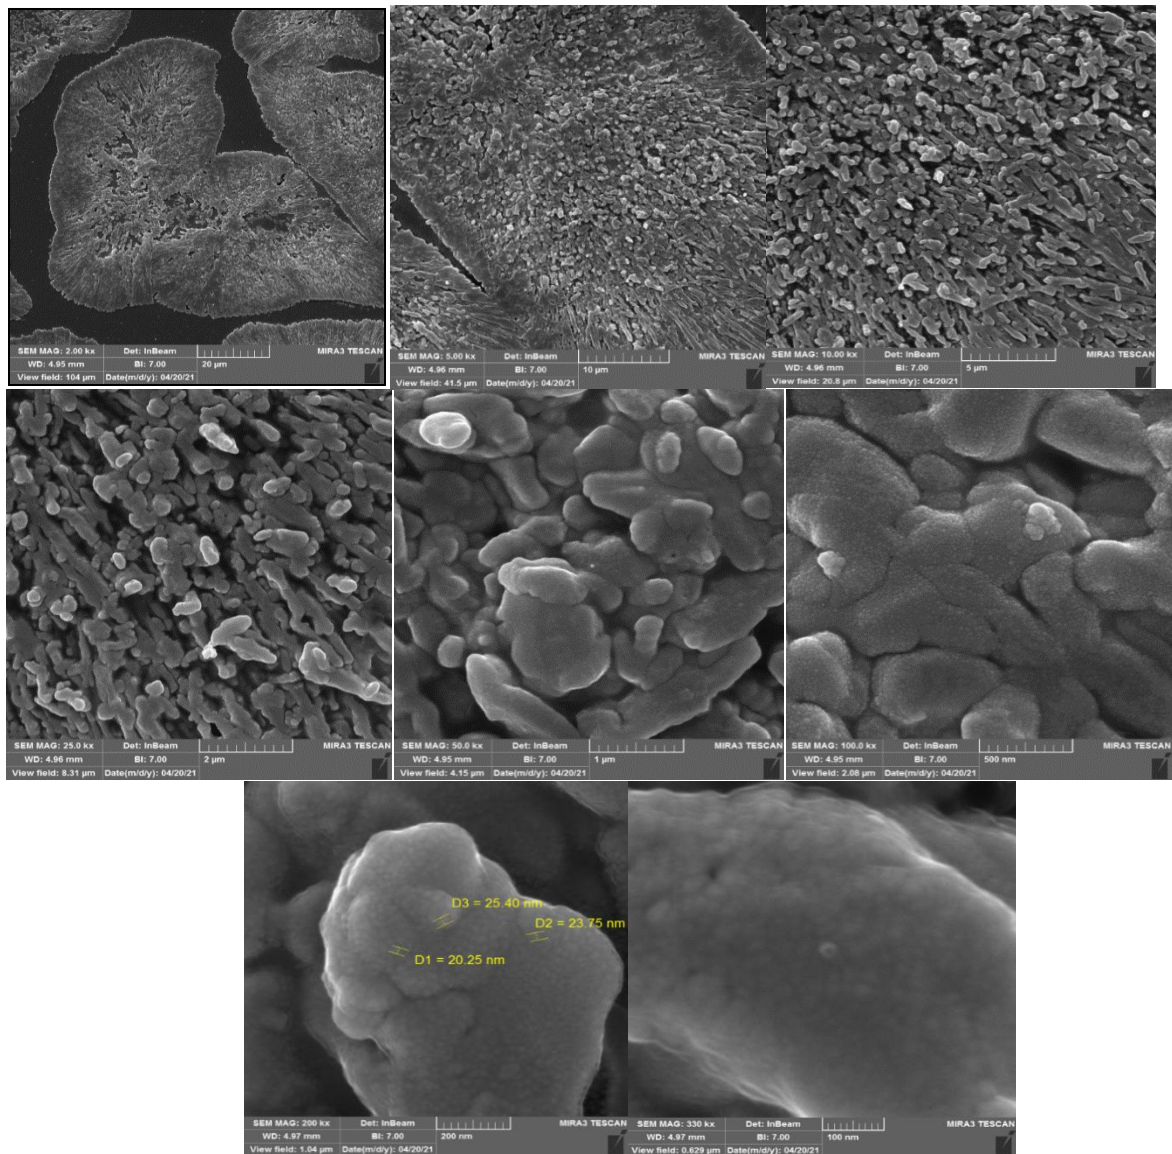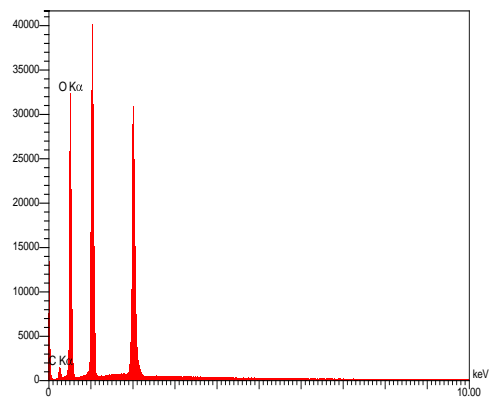



**B.**

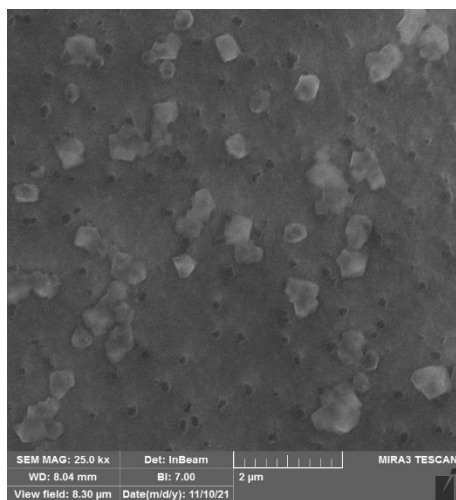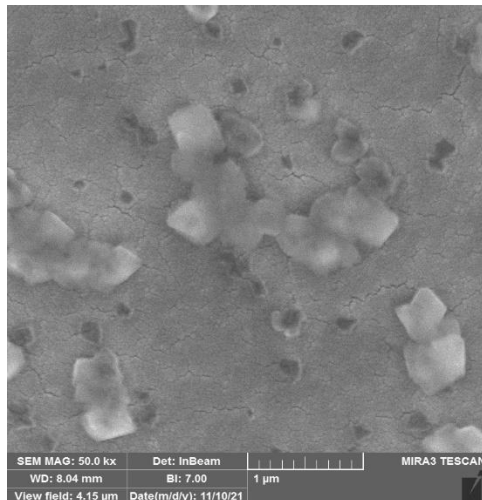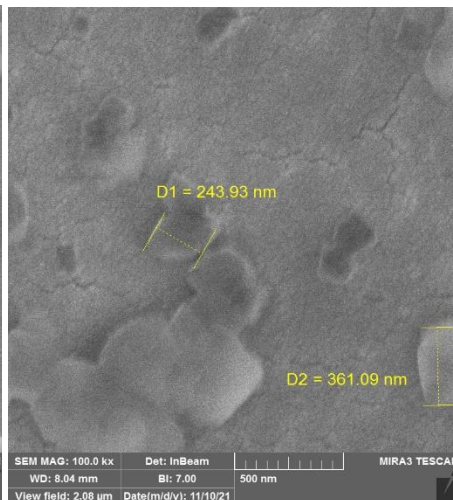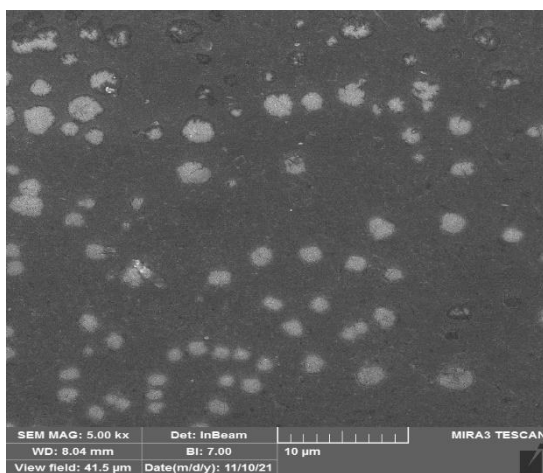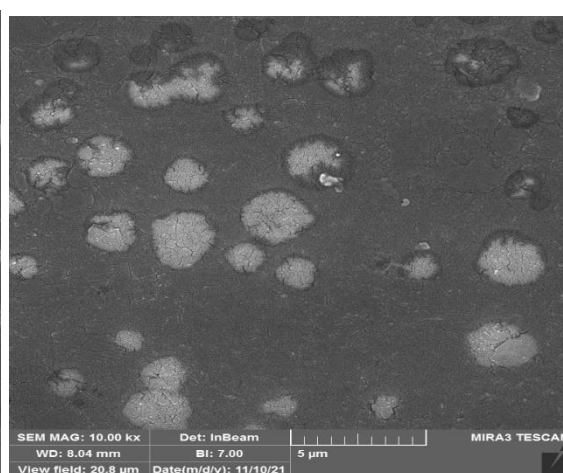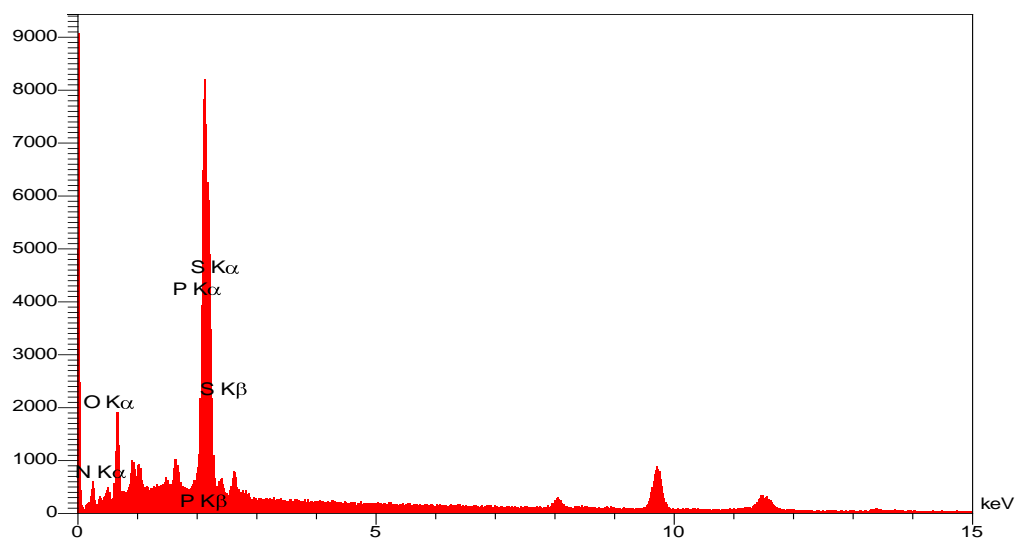

**C.**

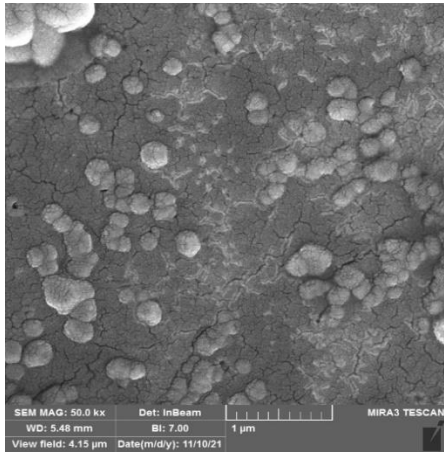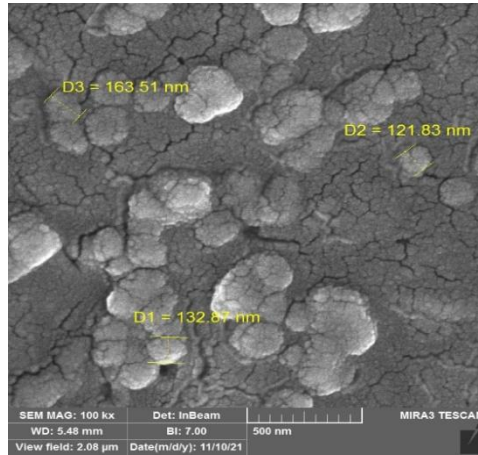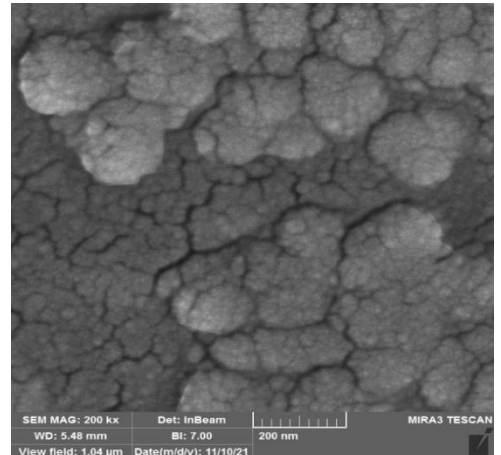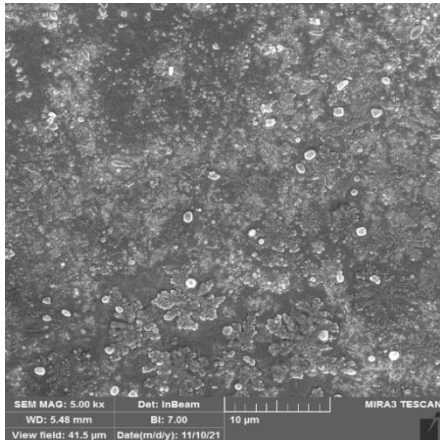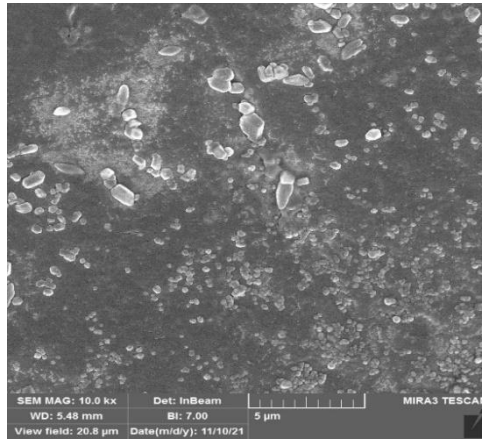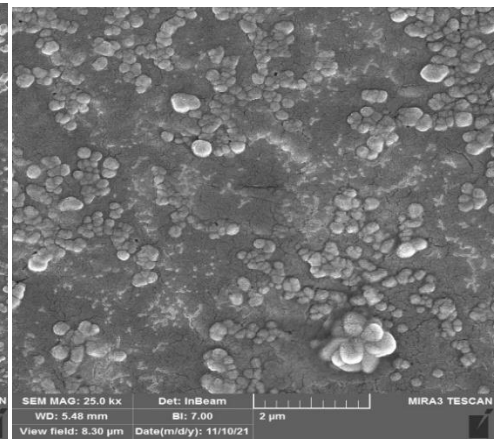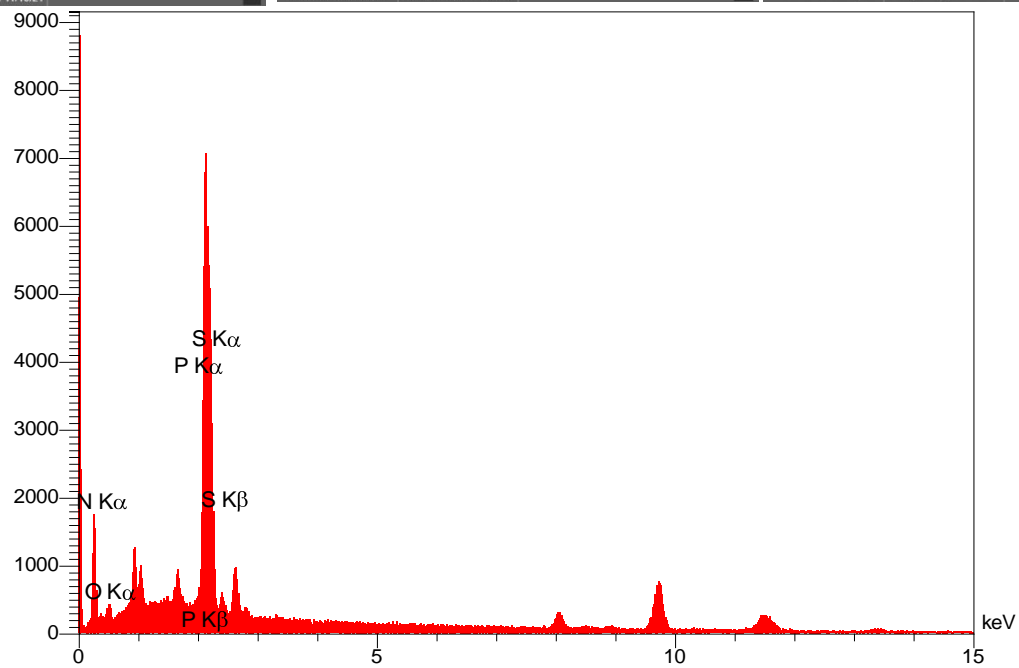

**D.**

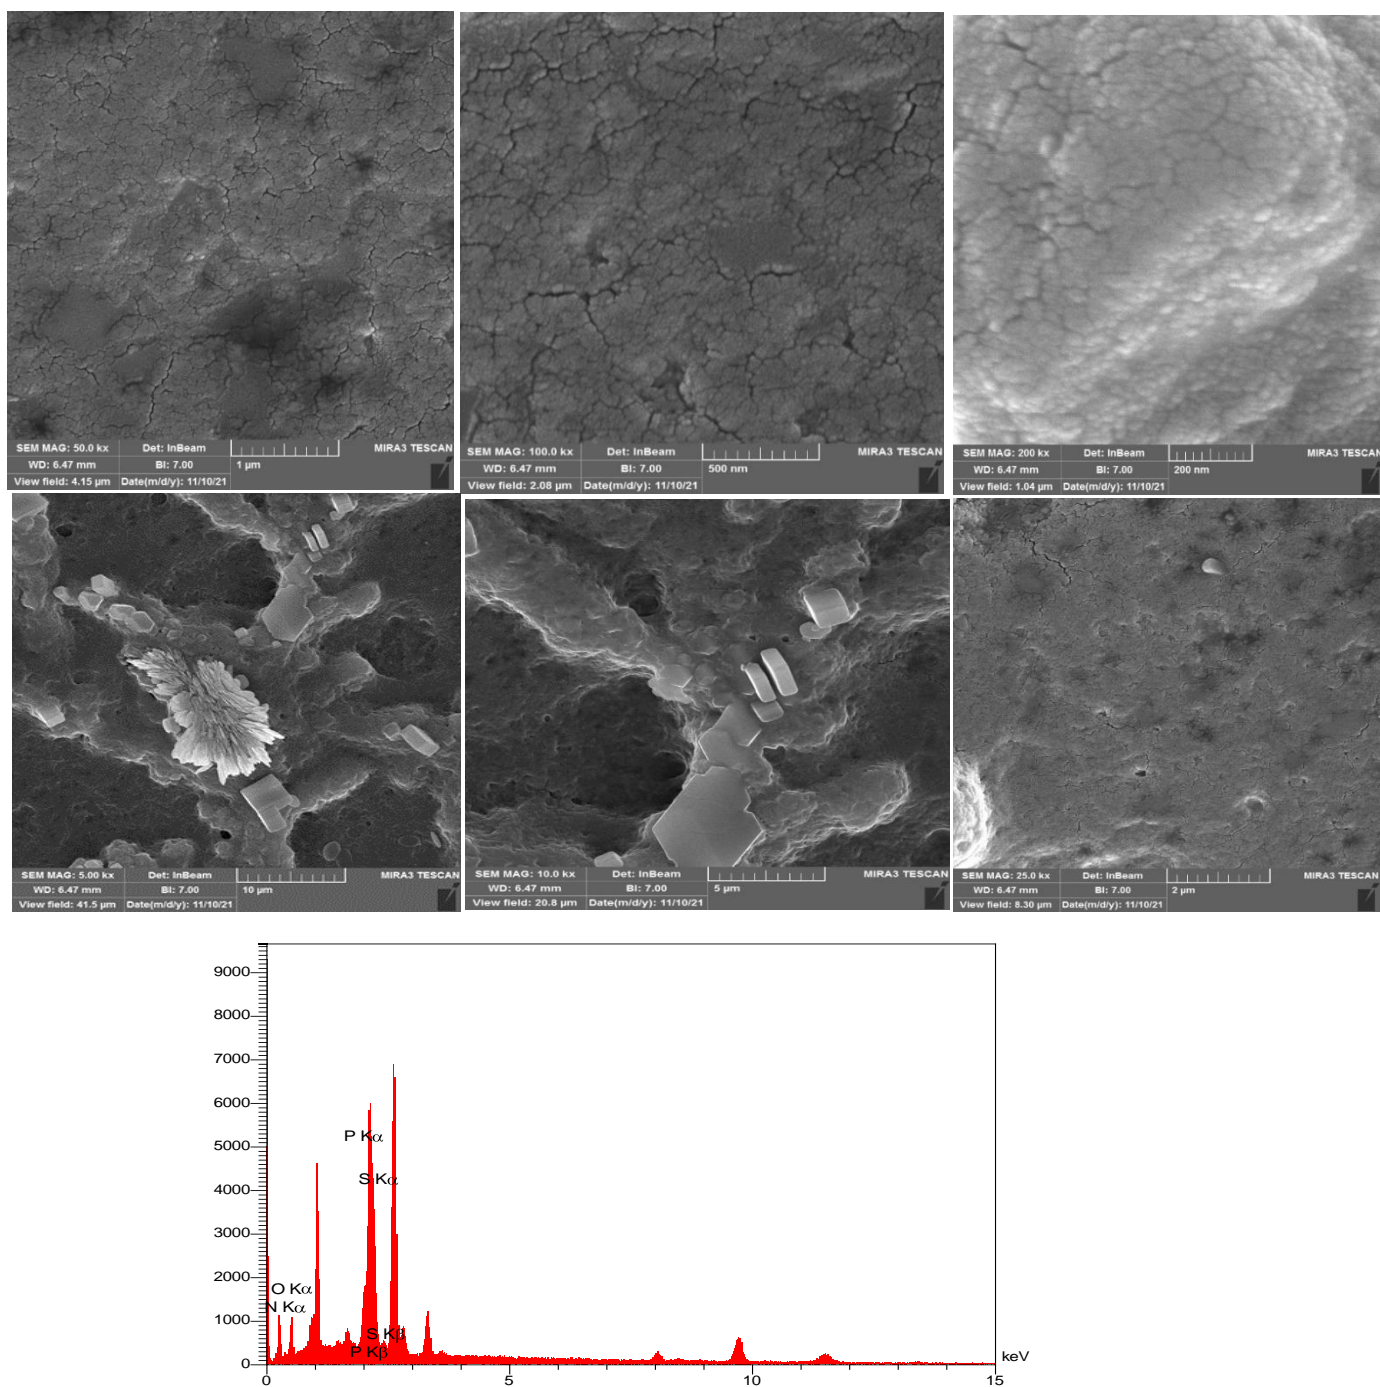

**Figure S4. A:** FE-SEM illustrations of  $P(\beta\text{-CD})$ -GCE in different magnification along with EDS. **B:** FE-SEM illustrations of  $P(\beta\text{-CD})$ -Ab1-GCE in different magnification along with EDS. **C:** FE-SEM illustrations of  $P(\beta\text{-CD})$ -Ab1-BSA-2-AG GCE in different magnification along with EDS. **D:** FE-SEM illustrations of  $P(\beta\text{-CD})$ -Ab1-BSA-2-AG-Ab2-HRP/AuNPs/TB/GLU GCE in different magnification along with EDS.



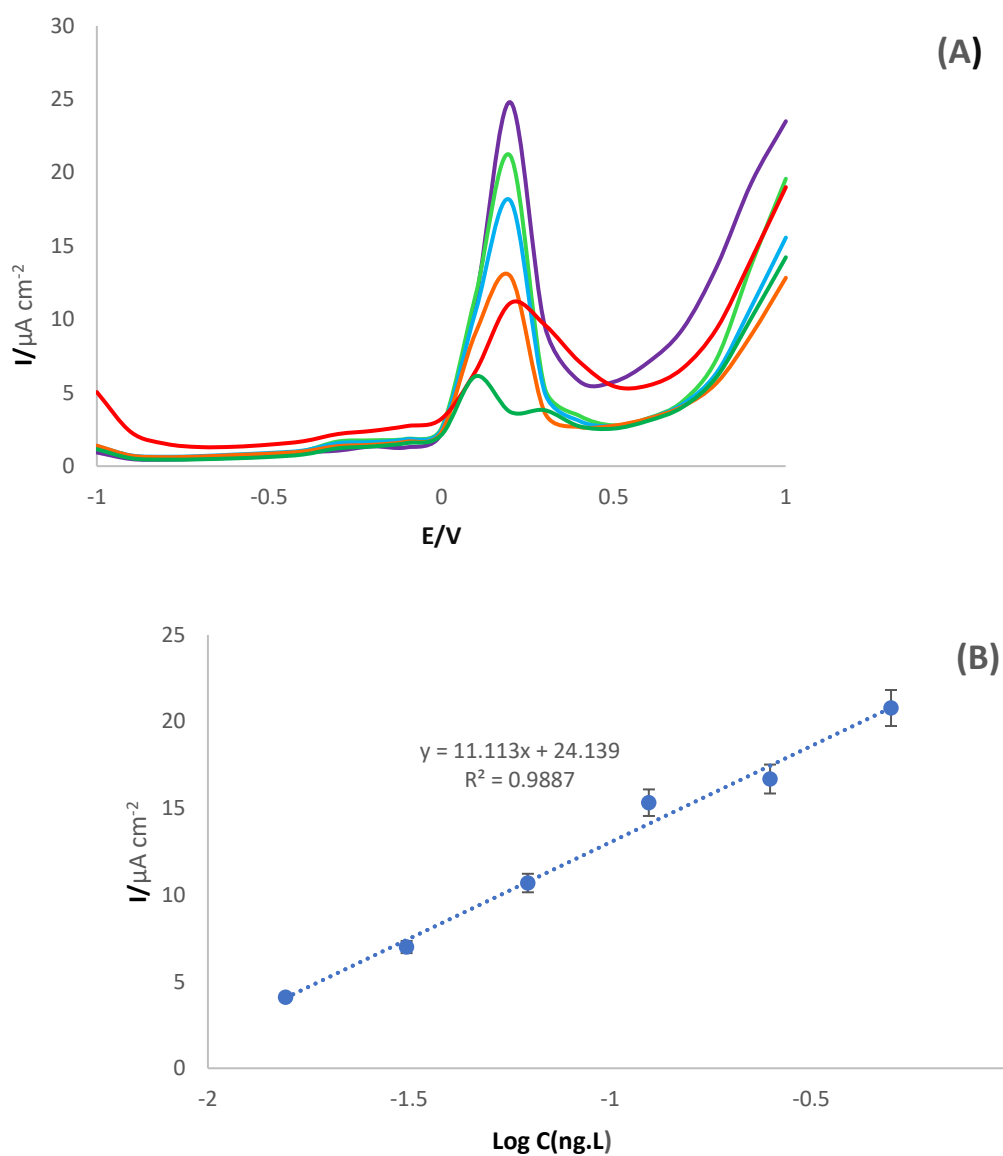

**Figure S5. A)** DPV responses of the immunosensor for different concentrations of 2-AG in human plasma sample: 0.5, 0.25, 0.125, 0.0625, 0.0312, 0.0156 ng/l in 0.03M ferro/ferricyanide. **B)** the calibration curves. ( $n=3$ ,  $Sd=1.23$ ).



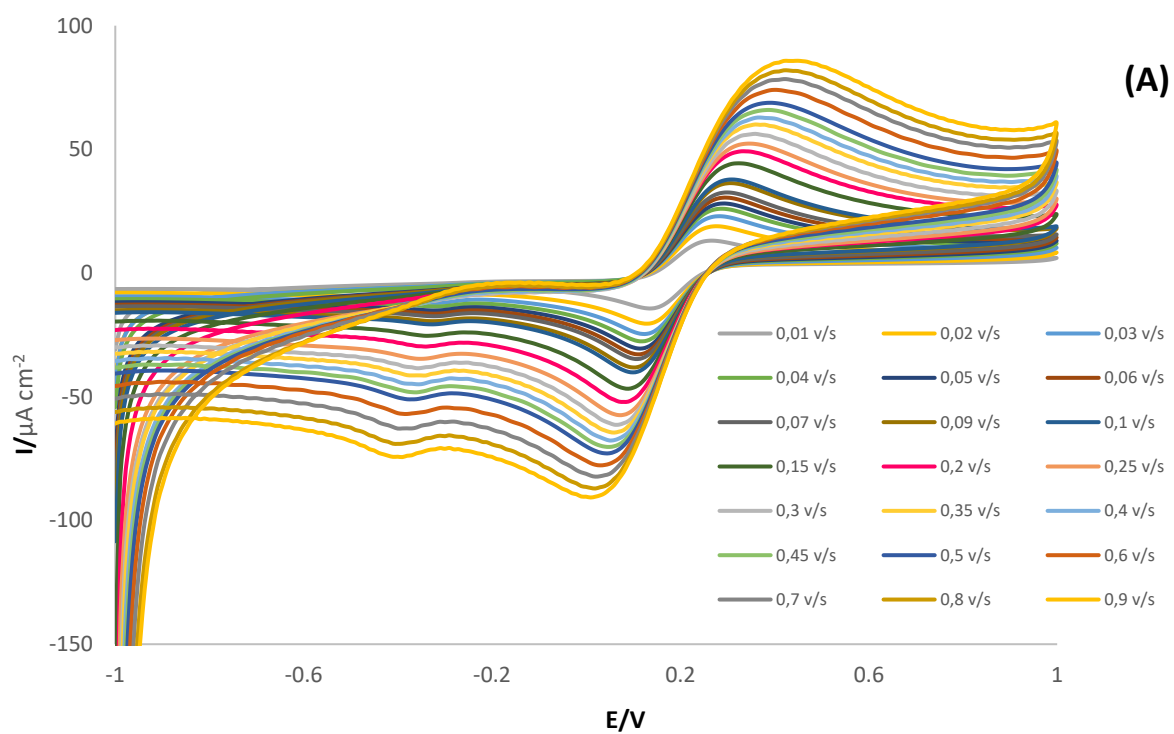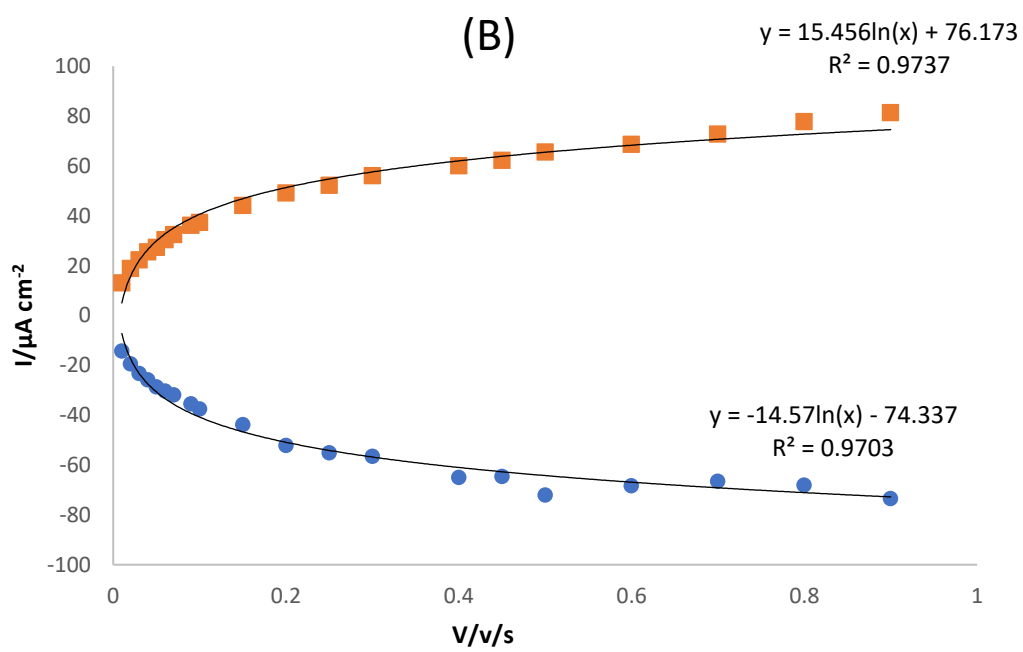

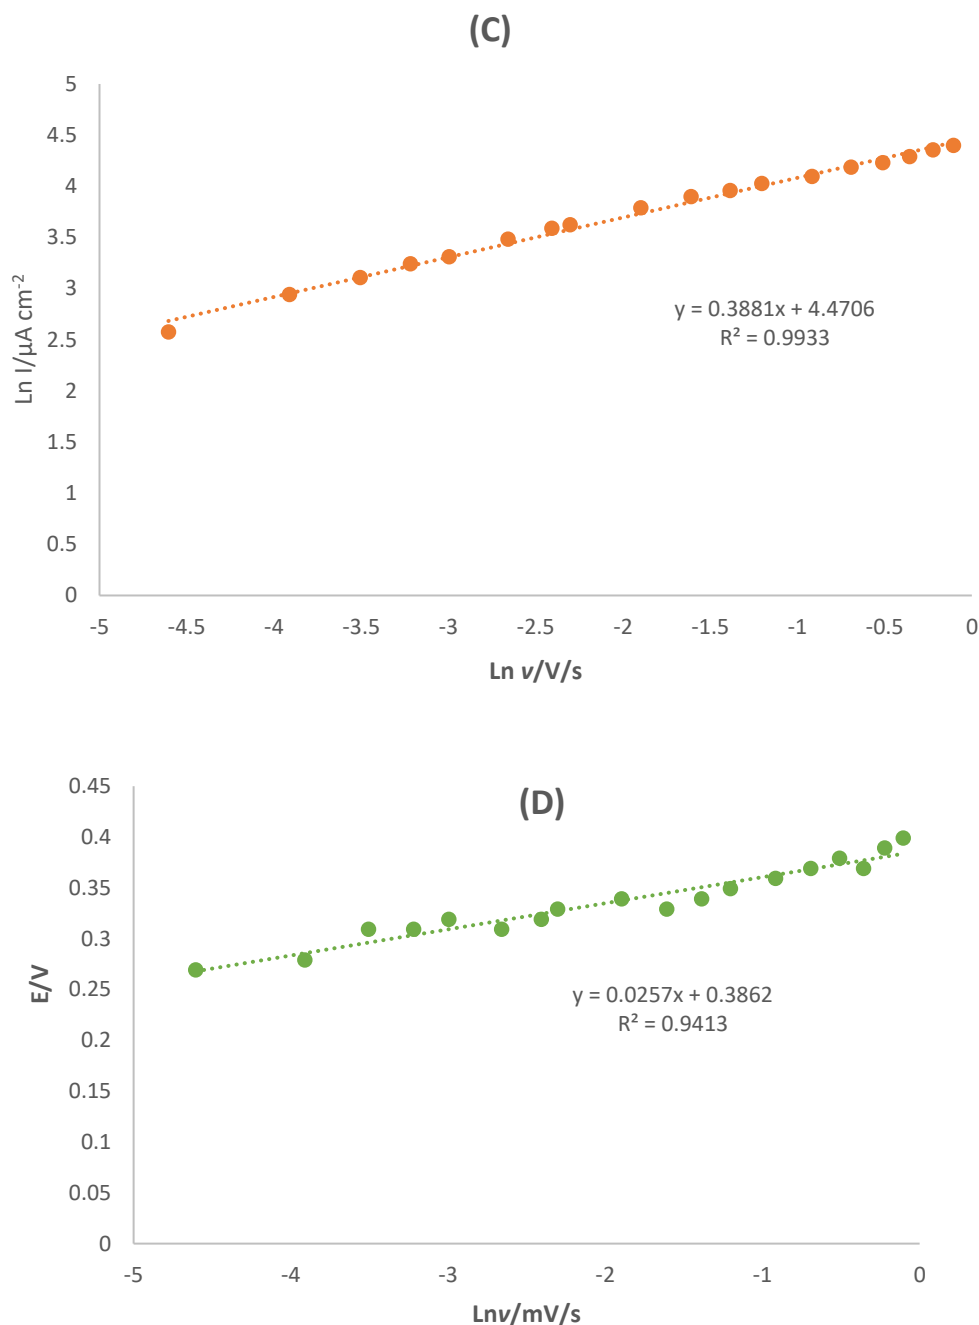

**Figure S6.** A) CVs of  $\beta$ CD/GCE in the presence of 0.03M  $K_4 Fe(CN)_6 / K_3 Fe(CN)_6 / KCl$  in different potential scan rates (10–900 mV/s) B) Relationship between sweep rates and oxidation peak currents using CV technique. C) Relationship between the Neperian logarithm of peak current ( $\ln I_{pa}$ ) and Neperian logarithm of scan rate ( $\ln v$ ). D) Variation of peak potential versus Neperian logarithm of sweep rates.

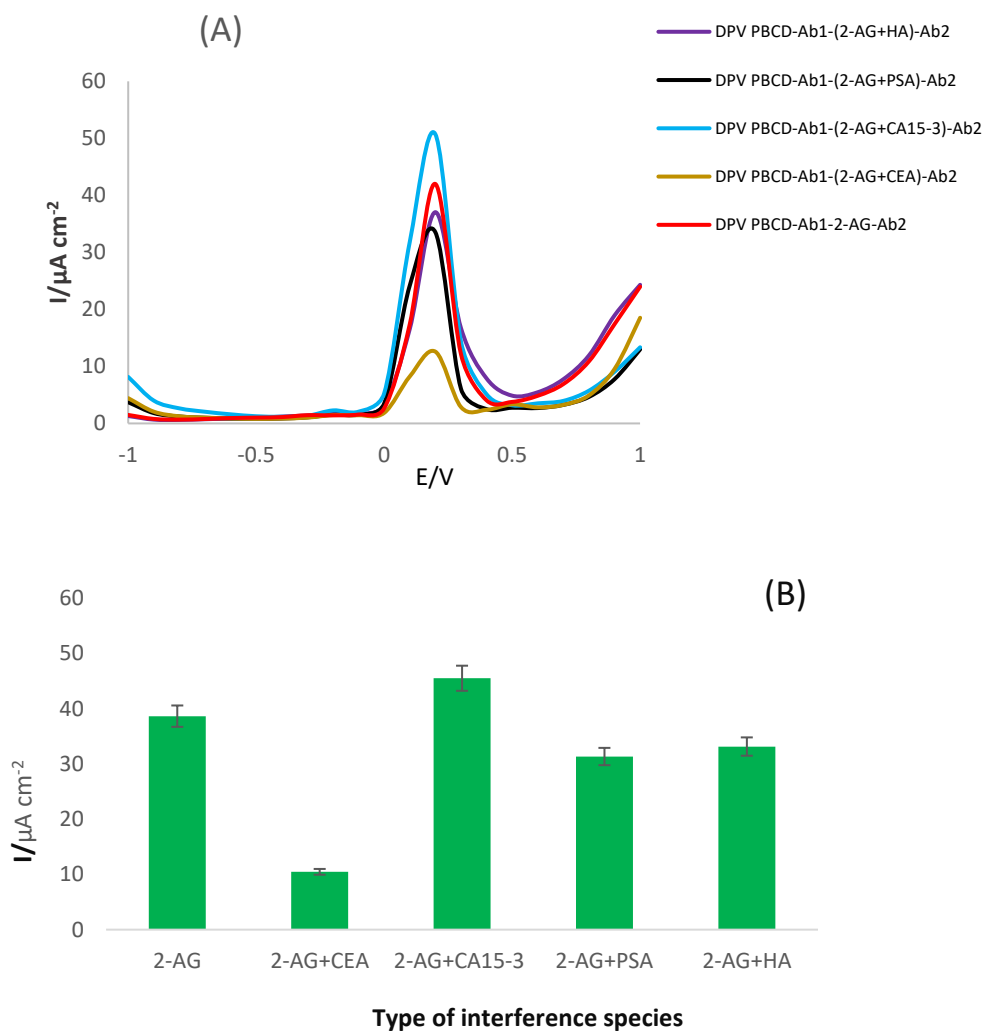

**Figure S7. A)** DPVs of the designed immunosensor in the presence of (CEA, CA15-3, PSA, HA) in 0.03 M  $K_4 Fe(CN)_6 / K_3 Fe(CN)_6 / KCl$  in a potential range of -1 V to 1V at scan rate of 0.1 V/s. **B)** Histogram of peak currents *versus* the type of interfering agents (n=3, SD=1.95).

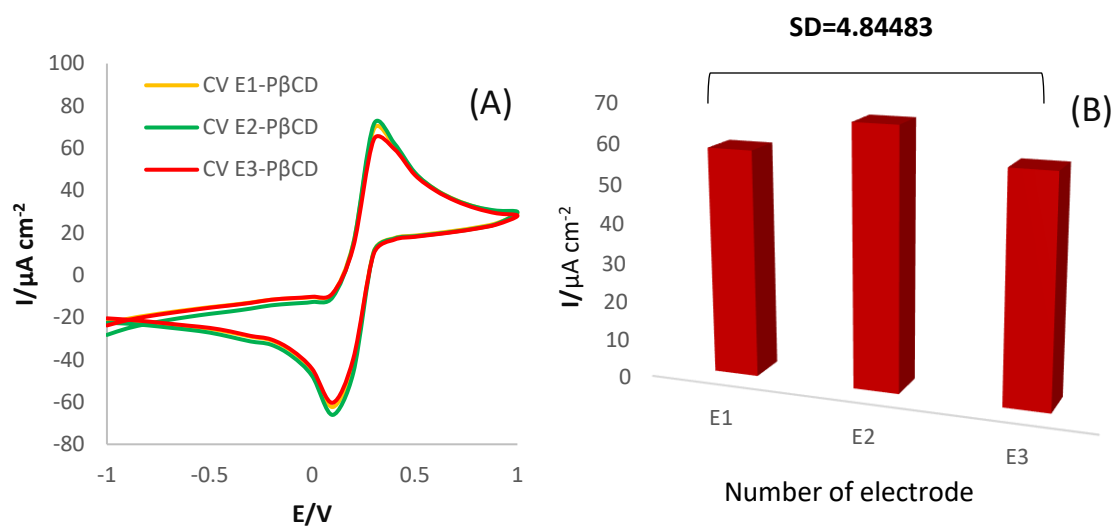

**Figure S8.** **A)** CVs of three p(β-CD)/GCE in the potential range of -1 to 1 in the solution of 0.03 M  $\text{K}_4\text{Fe}(\text{CN})_6 / \text{K}_3\text{Fe}(\text{CN})_6 / \text{KCl}$ . **B)** Histogram of peak currents vs. the number of electrodes.



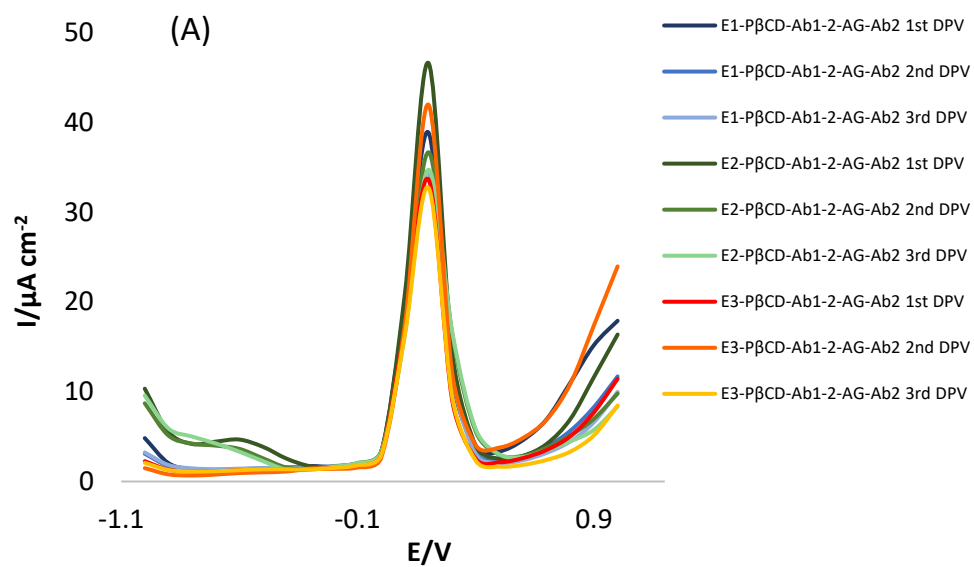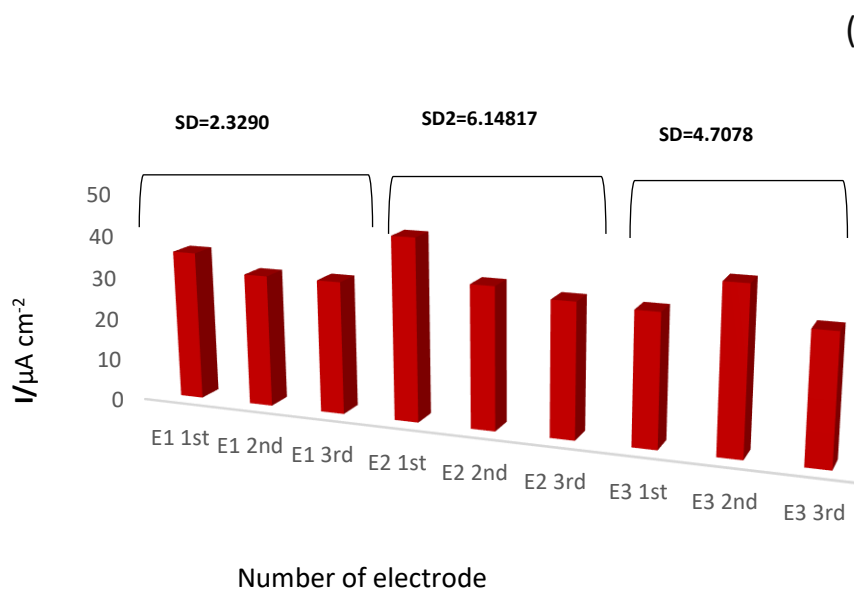

**Figure S9.** A) The DPVs of engineered immunosensor by three similar electrodes in the same condition. B) Histogram of peak current versus number of electrodes. Potential range of -1 to +1 V at a scan rate of 0.1 V/s.

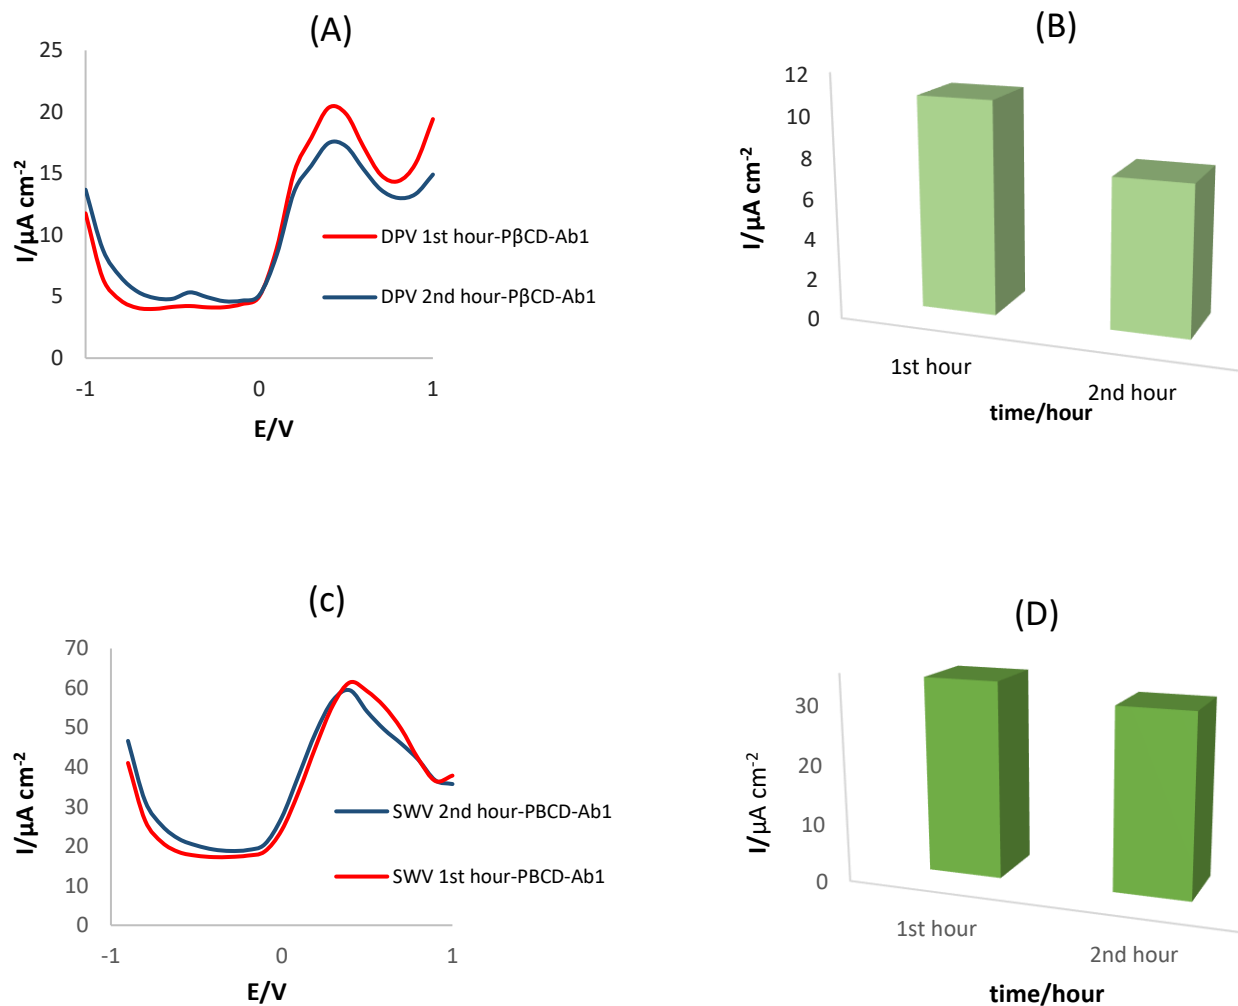

**Figure S10.** A) DPVs of P(βCD)/Ab1 modified GCE at different time of test. B) Histogram of peak current *versus* storage time of test (n=3, SD=1.29). C) SWVs of P(βCD)/Ab1 modified GCE at different time of test. D) Histogram of peak current *versus* time of test (n=3, SD=2.04).

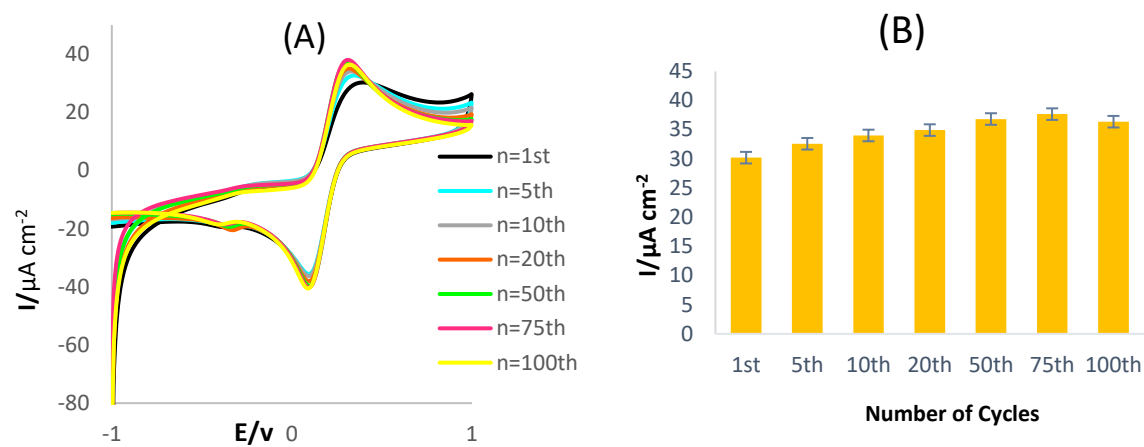

**Figure S11.** **A)** CV of P( $\beta$ -CD)-GCE (polymeric interface) in the potential range of -1 to 1 and scan rate of 0.1 V/s in 0.03M of ferro/ferricyanide in different cycle numbers. **B)** Histogram of peak current vs number of cycles ( $n=3$ ,  $SD=1.55$ ).

**Table S1.** Developed analytical methods for detection of 2-AG.

| Detection methods                           | Type of Sample       | LOD, LOQ, or LLOQ <sup>a</sup>   | Linear range                      | Limitation/advantages                                 | Ref.       |
|---------------------------------------------|----------------------|----------------------------------|-----------------------------------|-------------------------------------------------------|------------|
| HPLC-MS/MS                                  | Plasma               | 8.0 ng/mL (LOD)                  | 0.04-10.00 ng mL <sup>-1</sup>    | Expensive, hard to operation                          | [14]       |
| LC-MS/MS                                    |                      | 2 ng mL <sup>-1</sup> (LOD)      | -                                 | Need for advanced tools                               | [15]       |
| ELISA                                       | Human adipose tissue | 5 µM/L(LOD)                      | 5 - 100 µM/L                      | Expensive, need for advanced process                  | [16]       |
| LC-MS/MS                                    | Plasma               | 190 ng mL <sup>-1</sup> (LOQ)    | 0.04 - 12.3 ng mL <sup>-1</sup>   | Need for advanced tools                               | [17]       |
|                                             | Mouse brain          | 65 fmol (LOQ)                    | 0.02–20 ng mL <sup>-1</sup>       | Expensive, need for expert personal                   | [18]       |
| Electrochemical immunosensing               | Biological           | 0.00024 ng L <sup>-1</sup> (LOD) | 0.00024–0.0078 ng L <sup>-1</sup> | Easley and fast operation, no need for advanced tools | [19]       |
| LC-MS/MS                                    | Human cells          | 1.7 ng mL <sup>-1</sup> (LOD)    | -                                 | Hard to operation, need to expert operator            | [20]       |
| Sandwich type electrochemical immunosensing | Human plasma         | 0.0078 ng/L (LLOQ)               | 0.0078 - 1.0 ng L                 | Relatively cheap, easy to operate, fast response      | This Study |

<sup>a</sup> **LOD**; Limit of detection, **LOQ**; Limit of quantification, **LLOQ**; Low limit of quantification
